# Supplementary material
Source: PubMed Central journal article supplement (PMC6667831)
Supplement: NIHMS1041767-supplement-Table_S1.pdf [file NIHMS1041767-supplement-Table_S1.pdf]

**Table S1. DMS mutagenesis primers.**

| <b>Primer name</b>   | <b>Sequence (5'-3')</b> |
|----------------------|-------------------------|
| NatalEDIII-for-mut1  | cttagattgNNNggCGTgtca   |
| NatalEDIII-for-mut2  | agattgaagNNNgTgtcatac   |
| NatalEDIII-for-mut3  | ttgaaggGcNNNtcatactcc   |
| NatalEDIII-for-mut4  | aaggGcgtgNNNtactccttg   |
| NatalEDIII-for-mut5  | ggCGTgtcaNNNtccttGtgt   |
| NatalEDIII-for-mut6  | gtgtcatacNNNttgtgtacc   |
| NatalEDIII-for-mut7  | tcatactccNNNtgtaccGca   |
| NatalEDIII-for-mut8  | tactccttgNNNaccGcagcg   |
| NatalEDIII-for-mut9  | tccttGtgtNNNgcagcgttc   |
| NatalEDIII-for-mut10 | ttgtgtaccNNNgcgttcaca   |
| NatalEDIII-for-mut11 | tgtaccGcaNNNttcacattc   |
| NatalEDIII-for-mut12 | accGcagcgNNNacattcacc   |
| NatalEDIII-for-mut13 | gcagcgttcNNNttaccaag    |
| NatalEDIII-for-mut14 | gcgttcacaNNNaccaagatc   |
| NatalEDIII-for-mut15 | ttcacattcNNNaagatcccG   |
| NatalEDIII-for-mut16 | acattcaccNNNatcccggct   |
| NatalEDIII-for-mut17 | ttaccaagNNNccggctgaa    |
| NatalEDIII-for-mut18 | accaagatcNNNgctgaaaca   |
| NatalEDIII-for-mut19 | aagatcccGNNNgaaacactg   |
| NatalEDIII-for-mut20 | atcccggctNNNacactgcac   |
| NatalEDIII-for-mut21 | ccggctgaaNNNctgcacggg   |
| NatalEDIII-for-mut22 | gctgaaacaNNNcacgggaca   |
| NatalEDIII-for-mut23 | gaaacactgNNNgggacagtc   |
| NatalEDIII-for-mut24 | acactgcacNNNacagtcaca   |
| NatalEDIII-for-mut25 | ctgcacgggNNNgTcacagtg   |
| NatalEDIII-for-mut26 | cacgggacaNNNacagtggag   |
| NatalEDIII-for-mut27 | gggacagtcNNNgtggaggta   |
| NatalEDIII-for-mut28 | acagtcacaNNNgaggtagag   |
| NatalEDIII-for-mut29 | gtcacagtgNNNgtacagtac   |
| NatalEDIII-for-mut30 | acagtggagNNNcagtagca    |
| NatalEDIII-for-mut31 | gtggaggtaNNNtagcaggg    |
| NatalEDIII-for-mut32 | gaggtagagNNNgcagggaca   |
| NatalEDIII-for-mut33 | gtacagtacNNNgggacagat   |
| NatalEDIII-for-mut34 | cagtagcaNNNacagatgga    |
| NatalEDIII-for-mut35 | tacgcagggNNNgatggacct   |
| NatalEDIII-for-mut36 | gcagggacaNNNggacctgac   |
| NatalEDIII-for-mut37 | gggacagatNNNccttgcaag   |
| NatalEDIII-for-mut38 | acagatggaNNNtgcaaggtt   |
| NatalEDIII-for-mut39 | gatggacctNNNaaggttcca   |
| NatalEDIII-for-mut40 | ggacctgacNNNgttccagct   |
| NatalEDIII-for-mut41 | ccttgcaagNNNccagctcag   |
| NatalEDIII-for-mut42 | tgcaaggttNNNgctcagatg   |
| NatalEDIII-for-mut43 | aaggttccaNNNcagatggcg   |
| NatalEDIII-for-mut44 | gttccagctNNNatggcggtg   |
| NatalEDIII-for-mut45 | ccagctcagNNNgcgggtggac  |

|                      |                       |
|----------------------|-----------------------|
| NatalEDIII-for-mut46 | gctcagatgNNNgtggacatg |
| NatalEDIII-for-mut47 | cagatggcgNNNgacatgcaa |
| NatalEDIII-for-mut48 | atggcggtgNNNatgcaaact |
| NatalEDIII-for-mut49 | gcggtggacNNNcaaactctg |
| NatalEDIII-for-mut50 | gtggacatgNNNactctgacc |
| NatalEDIII-for-mut51 | gacatgcaaNNNctgaccca  |
| NatalEDIII-for-mut52 | atgcaaactNNNaccccagtt |
| NatalEDIII-for-mut53 | caaactctgNNNccagttggg |
| NatalEDIII-for-mut54 | actctgaccNNNgttgggagg |
| NatalEDIII-for-mut55 | ctgacccaNNNgggaggttg  |
| NatalEDIII-for-mut56 | accccagttNNNaggttgata |
| NatalEDIII-for-mut57 | ccagttgggNNNttgataacc |
| NatalEDIII-for-mut58 | gttgggaggNNNataaccgct |
| NatalEDIII-for-mut59 | gggaggttgNNNaccgctaac |
| NatalEDIII-for-mut60 | aggttgataNNNgctaacccc |
| NatalEDIII-for-mut61 | ttgataaccNNNaaccccgta |
| NatalEDIII-for-mut62 | ataaccgctNNNcccgtaatc |
| NatalEDIII-for-mut63 | accgctaacNNNgtaatcact |
| NatalEDIII-for-mut64 | gctaaccccNNNatcactgaa |
| NatalEDIII-for-mut65 | aaccccgtaNNNactgaaagc |
| NatalEDIII-for-mut66 | cccgtaatcNNNgaaagcact |
| NatalEDIII-for-mut67 | gtaatcactNNNagcactgag |
| NatalEDIII-for-mut68 | atcactgaaNNNactgagaac |
| NatalEDIII-for-mut69 | actgaaagcNNNgagaactct |
| NatalEDIII-for-mut70 | gaaagcactNNNaactctaag |
| NatalEDIII-for-mut71 | agcactgagNNNtctaagatg |
| NatalEDIII-for-mut72 | actgagaacNNNaagatgatg |
| NatalEDIII-for-mut73 | gagaactctNNNatgatgctg |
| NatalEDIII-for-mut74 | aactctaagNNNatgctggaa |
| NatalEDIII-for-mut75 | tctaagatgNNNctggaactt |
| NatalEDIII-for-mut76 | aagatgatgNNNgaacttgat |
| NatalEDIII-for-mut77 | atgatgctgNNNcttgatcca |
| NatalEDIII-for-mut78 | atgctggaaNNNgatccacca |
| NatalEDIII-for-mut79 | ctggaacttNNNccaccattt |
| NatalEDIII-for-mut80 | gaacttgatNNNccatttggg |
| NatalEDIII-for-mut81 | cttgatccaNNNtttggggac |
| NatalEDIII-for-mut82 | gatccaccaNNNggggactct |
| NatalEDIII-for-mut83 | ccaccatttNNNgactcttac |
| NatalEDIII-for-mut84 | ccatttgggNNNtcttacatt |
| NatalEDIII-for-mut85 | tttggggacNNNtacattgtc |
| NatalEDIII-for-mut86 | ggggactctNNNattgtcata |
| NatalEDIII-for-mut87 | gactcttacNNNgtcatagga |
| NatalEDIII-for-mut88 | tcttacattNNNataggagtc |
| NatalEDIII-for-mut89 | tacattgtcNNNggagtcggg |
| NatalEDIII-for-mut90 | attgtcataNNNgtcggggag |
| NatalEDIII-for-mut91 | gtcataggaNNNggggagaag |
| NatalEDIII-for-mut92 | ataggagtcNNNgagaagaag |
| NatalEDIII-for-mut93 | ggagtcgggNNNaagaagatc |

|                       |                        |
|-----------------------|------------------------|
| NatalEDIII-for-mut94  | gtcggggagNNNaagatcacc  |
| NatalEDIII-for-mut95  | ggggagaagNNNatcaccac   |
| NatalEDIII-for-mut96  | gagaagaagNNNaccaccac   |
| NatalEDIII-for-mut97  | aagaagatcNNNcaccactgg  |
| NatalEDIII-for-mut98  | aagatcaccNNNcactggcac  |
| NatalEDIII-for-mut99  | atcaccacNNNtggcacagg   |
| NatalEDIII-for-mut100 | accaccacNNNcacaggagt   |
| NatalEDIII-for-mut101 | caccactggNNNaggagtggc  |
| NatalEDIII-for-mut102 | cactggcacNNNagtggcagc  |
| NatalEDIII-for-mut103 | tggcacaggNNNggcagcacc  |
| NatalEDIII-for-mut104 | cacaggagtNNNagcaccatt  |
| NatalEDIII-for-mut105 | aggagtggcNNNaccattgga  |
| NatalEDIII-for-mut106 | agtggcagcNNNatggaaa    |
| NatalEDIII-for-mut107 | ggcagcaccNNNggaaaagca  |
| NatalEDIII-for-mut108 | agcaccattNNNaagcattt   |
| NatalEDIII-for-mut109 | accattggaNNNgcatttgaa  |
| NatalEDIII-for-mut110 | attggaaaNNNtttgaagcc   |
| NatalEDIII-for-mut111 | ggaaaagcaNNNgaagccact  |
| NatalEDIII-for-mut112 | aaagcatttNNNgccactgtg  |
| NatalEDIII-for-mut113 | gcatttgaaNNNactgtgaga  |
| NatalEDIII-for-mut114 | tttgaagccNNNgtgagaggt  |
| NatalEDIII-for-mut115 | gaagccactNNNagaggtgcc  |
| NatalEDIII-for-mut116 | gccactgtgNNNggtgccaag  |
| NatalEDIII-for-mut117 | actgtgagaNNNgccaagaga  |
| NatalEDIII-for-mut118 | gtgagaggtNNNaagagaatg  |
| NatalEDIII-for-mut119 | agaggtgccNNNagaatggca  |
| NatalEDIII-for-mut120 | ggtgccaagNNNatggcagtc  |
| NatalEDIII-for-mut121 | gccaagagaNNNgcagtcttg  |
| NatalEDIII-for-mut122 | aagagaatgNNNgtccttggga |
| NatalEDIII-for-mut123 | agaatggcaNNNttgggagac  |
| NatalEDIII-for-mut124 | atggcagtcNNNggagacaca  |
| NatalEDIII-for-mut125 | gcagtcttgNNNgacacagcc  |
| NatalEDIII-for-mut126 | gtccttgggaNNNacagcctgg |
| NatalEDIII-for-mut127 | ttgggagacNNNgcctgggac  |
| NatalEDIII-for-mut128 | ggagacacaNNNtgggacttt  |
| NatalEDIII-for-mut129 | gacacagccNNNgactttgga  |
| NatalEDIII-for-mut130 | acagcctggNNNtttggatca  |
| NatalEDIII-for-mut131 | gcctgggacNNNggatcagtt  |
| NatalEDIII-for-mut132 | tgggactttNNNtcagttgga  |
| NatalEDIII-for-mut133 | gactttggaNNNgttggaggc  |
| NatalEDIII-for-mut134 | tttggatcaNNNggagggcgt  |
| NatalEDIII-for-mut135 | ggatcagttNNNggcgctctc  |
| NatalEDIII-for-mut136 | tcagttggaNNNgctctcaac  |
| NatalEDIII-for-mut137 | gttggaggcNNNctcaactca  |
| NatalEDIII-for-mut138 | ggagggcgtNNNaactcattg  |
| NatalEDIII-for-mut139 | ggcgctctcNNNtcattgggc  |
| NatalEDIII-for-mut140 | gctctcaacNNNttgggcaag  |
| NatalEDIII-for-mut141 | ctcaactcaNNNggcaagggc  |

|                       |                        |
|-----------------------|------------------------|
| NatalEDIII-for-mut142 | aactcattgNNNaagggcatc  |
| NatalEDIII-for-mut143 | tcattggggcNNNggcatccat |
| NatalEDIII-for-mut144 | ttgggcaagNNNatccatcaa  |
| NatalEDIII-for-mut145 | ggcaagggcNNNcatcaaatt  |
| NatalEDIII-for-mut146 | aagggcatcNNNcaaattttt  |
| NatalEDIII-for-mut147 | ggcatccatNNNatttttggga |
| NatalEDIII-for-mut148 | atccatcaaNNNtttggagca  |
| NatalEDIII-for-mut149 | catcaaattNNNggagcagct  |
| NatalEDIII-for-mut150 | caaatttttNNNgcagctttc  |
| NatalEDIII-for-mut151 | atttttggaNNNgctttcaaa  |
| NatalEDIII-for-mut152 | tttggagcaNNNttcaaatca  |
| NatalEDIII-for-mut153 | ggagcagctNNNaatcattg   |
| NatalEDIII-for-mut154 | gcagctttcNNNtcattgttt  |
| NatalEDIII-for-mut155 | gctttcaaaNNNttgtttggga |
| NatalEDIII-for-mut156 | ttcaaatcaNNNtttggagga  |
| NatalEDIII-for-mut157 | aatcattgNNNggaggaatg   |
| NatalEDIII-for-mut158 | tcattgtttNNNggaaatgtcc |
| NatalEDIII-for-mut159 | ttgtttgggaNNNatgtcctgg |
| NatalEDIII-for-mut160 | tttggaggaNNNtcctggttc  |
| NatalEDIII-for-mut161 | ggaggaatgNNNtggttctca  |
| NatalEDIII-for-mut162 | ggaatgtccNNNttctcacia  |
| NatalEDIII-for-mut163 | atgtcctggNNNtcacaaatc  |
| NatalEDIII-for-mut164 | tcctgggttcNNNcaaatcctc |
| NatalEDIII-for-mut165 | tggttctcaNNNtccctcatt  |
| NatalEDIII-for-mut166 | ttctcaciaNNNctcattgga  |
| NatalEDIII-for-mut167 | tcacaaatcNNNattggaacg  |
| NatalEDIII-for-mut168 | caaatcctcNNNggaaacgttg |
| NatalEDIII-for-mut169 | atcctcattNNNacggttgctg |
| NatalEDIII-for-mut170 | ctcattggaNNNttgctgatg  |
| NatalEDIII-for-mut171 | attggaacgNNNctgatgtgg  |
| NatalEDIII-for-mut172 | ggaacgttgNNNatgtggttg  |
| NatalEDIII-for-mut173 | acgttgctgNNNtggttgggt  |
| NatalEDIII-for-mut174 | ttgctgatgNNNttgggtctg  |
| NatalEDIII-for-mut175 | ctgatgtggNNNgggtctgaac |
| NatalEDIII-for-mut176 | atgtggttgNNNctgaacaca  |
| NatalEDIII-for-mut177 | tggttgggtNNNaacacaaag  |
| NatalEDIII-for-mut178 | ttgggtctgNNNacaaagaat  |
| NatalEDIII-for-mut179 | ggtctgaacNNNaagaatgga  |
| NatalEDIII-for-mut180 | ctgaacacaNNNaatggatct  |
| NatalEDIII-for-mut181 | aacacaaagNNNggatctatt  |
| NatalEDIII-for-mut182 | acaaagaatNNNtctatttcc  |
| NatalEDIII-for-mut183 | aagaatggaNNNatttccctt  |
| NatalEDIII-for-mut184 | aatggatctNNNtcccttatg  |
| NatalEDIII-for-mut185 | ggatctattNNNcttatgtgc  |
| NatalEDIII-for-mut186 | tctatttccNNNatgtgcttg  |
| NatalEDIII-for-mut187 | atttcccttNNNtgcttggcc  |
| NatalEDIII-for-mut188 | tcccttatgNNNttggcctta  |
| NatalEDIII-for-mut189 | cttatgtgcNNNgccttaggg  |

|                       |                        |
|-----------------------|------------------------|
| NatalEDIII-for-mut190 | atgtgcttgNNNttaggggga  |
| NatalEDIII-for-mut191 | tgcttggccNNNgggggagtg  |
| NatalEDIII-for-mut192 | ttggccttaNNNggagtggtg  |
| NatalEDIII-for-mut193 | gccttagggNNNgtggtgatc  |
| NatalEDIII-for-mut194 | ttagggggaNNNttgatcctc  |
| NatalEDIII-for-mut195 | gggggagtgNNNtcttctta   |
| NatalEDIII-for-mut196 | ggagtggtgNNNttcttatcc  |
| NatalEDIII-for-mut197 | gtggtgatcNNNttatccaca  |
| NatalEDIII-for-mut198 | ttgatcctcNNNtccacagcc  |
| NatalEDIII-for-mut199 | atcttcttaNNNacagccgtc  |
| NatalEDIII-for-mut200 | ttcttatccNNNgccgtctct  |
| NatalEDIII-for-mut201 | ttatccacaNNNgtctctgct  |
| NatalEDIII-for-mut202 | tccacagccNNNtctgctgat  |
| NatalEDIII-for-mut203 | acagccgtcNNNgtgatgtg   |
| NatalEDIII-for-mut204 | gccgtctctNNNgatgtgggg  |
| NatalEDIII-rev-mut1   | tgacacgccNNNcaatctaag  |
| NatalEDIII-rev-mut2   | gtatgacacNNNcttcaatct  |
| NatalEDIII-rev-mut3   | ggagtatgaNNNgcccttcaa  |
| NatalEDIII-rev-mut4   | caaggagtaNNNcacgccctt  |
| NatalEDIII-rev-mut5   | acacaaggaNNNtgacacgcc  |
| NatalEDIII-rev-mut6   | ggtacacaaNNNgtatgacac  |
| NatalEDIII-rev-mut7   | tgcggtacaNNNggagtatga  |
| NatalEDIII-rev-mut8   | cgctgcggtNNNcaaggagta  |
| NatalEDIII-rev-mut9   | gaacgctgcNNNacacaagga  |
| NatalEDIII-rev-mut10  | tgtgaacgcNNNgggtacacaa |
| NatalEDIII-rev-mut11  | gaatgtgaaNNNtgcggtaca  |
| NatalEDIII-rev-mut12  | ggtgaatgtNNNcgctgcggt  |
| NatalEDIII-rev-mut13  | cttgggtgaaNNNgaacgctgc |
| NatalEDIII-rev-mut14  | gatcttgggtNNNtgtgaacgc |
| NatalEDIII-rev-mut15  | cgggatcttNNNgaatgtgaa  |
| NatalEDIII-rev-mut16  | agccgggatNNNgggtgaatgt |
| NatalEDIII-rev-mut17  | ttcagccggNNNcttgggtgaa |
| NatalEDIII-rev-mut18  | tgtttcagcNNNgatcttgggt |
| NatalEDIII-rev-mut19  | cagtgtttcNNNcgggatctt  |
| NatalEDIII-rev-mut20  | gtgcagtgtNNNagccgggat  |
| NatalEDIII-rev-mut21  | cccgtgcagNNNttcagccgg  |
| NatalEDIII-rev-mut22  | tgtcccgtgNNNtgtttcagc  |
| NatalEDIII-rev-mut23  | gactgtcccNNNcagtgtttc  |
| NatalEDIII-rev-mut24  | tgtgactgtNNNgtgcagtgt  |
| NatalEDIII-rev-mut25  | cactgtgacNNNcccgtgcag  |
| NatalEDIII-rev-mut26  | ctccactgtNNNtgtcccgtg  |
| NatalEDIII-rev-mut27  | tacctccacNNNgactgtccc  |
| NatalEDIII-rev-mut28  | ctgtacctcNNNtgtgactgt  |
| NatalEDIII-rev-mut29  | gtactgtacNNNcactgtgac  |
| NatalEDIII-rev-mut30  | tgcgtagctgNNNctccactgt |
| NatalEDIII-rev-mut31  | ccctgcgtaNNNtacctccac  |
| NatalEDIII-rev-mut32  | tgtccctgcNNNctgtacctc  |
| NatalEDIII-rev-mut33  | atctgtcccNNNgtactgtac  |

|                      |                        |
|----------------------|------------------------|
| NatalEDIII-rev-mut34 | tccatctgtNNNtgcgtactg  |
| NatalEDIII-rev-mut35 | aggtccatcNNNccctgcgta  |
| NatalEDIII-rev-mut36 | gcaaggtccNNNtgtccctgc  |
| NatalEDIII-rev-mut37 | cttgcaaggNNNtctgtccc   |
| NatalEDIII-rev-mut38 | aaccttgcaNNNtccatctgt  |
| NatalEDIII-rev-mut39 | tggaaccttNNNaggtccatc  |
| NatalEDIII-rev-mut40 | agctggaacNNNgcaaggtec  |
| NatalEDIII-rev-mut41 | ctgagctggNNNcttgcaagg  |
| NatalEDIII-rev-mut42 | catctgagcNNNaaccttgca  |
| NatalEDIII-rev-mut43 | cgccatctgNNNtggaaacctt |
| NatalEDIII-rev-mut44 | caccgccatNNNagctggaac  |
| NatalEDIII-rev-mut45 | gtccaccgcNNNctgagctgg  |
| NatalEDIII-rev-mut46 | catgtccacNNNcatctgagc  |
| NatalEDIII-rev-mut47 | ttgcatgtcNNNcgccatctg  |
| NatalEDIII-rev-mut48 | agtttgcatNNNcaccgccat  |
| NatalEDIII-rev-mut49 | cagagtttgNNNgtccaccgc  |
| NatalEDIII-rev-mut50 | ggtcagagtNNNcatgtccac  |
| NatalEDIII-rev-mut51 | tggggtcagNNNttgcatgtc  |
| NatalEDIII-rev-mut52 | aactgggggtNNNagtttgcat |
| NatalEDIII-rev-mut53 | cccaactggNNNcagagtttg  |
| NatalEDIII-rev-mut54 | cctcccaacNNNggtcagagt  |
| NatalEDIII-rev-mut55 | caacctcccNNNtggggtcag  |
| NatalEDIII-rev-mut56 | tatcaacctNNNaactgggggt |
| NatalEDIII-rev-mut57 | ggttatcaaNNNcccaactgg  |
| NatalEDIII-rev-mut58 | agcggttatNNNcctcccaac  |
| NatalEDIII-rev-mut59 | gtagcgggtNNNcaacctccc  |
| NatalEDIII-rev-mut60 | ggggttagcNNNtatcaacct  |
| NatalEDIII-rev-mut61 | tacgggggtNNNggttatcaa  |
| NatalEDIII-rev-mut62 | gattacgggNNNagcggttat  |
| NatalEDIII-rev-mut63 | agtgattacNNNgttagcgggt |
| NatalEDIII-rev-mut64 | ttcagtgatNNNgggggttagc |
| NatalEDIII-rev-mut65 | gctttcagtNNNtacgggggtt |
| NatalEDIII-rev-mut66 | agtgctttcNNNgattacggg  |
| NatalEDIII-rev-mut67 | ctcagtgctNNNagtgattac  |
| NatalEDIII-rev-mut68 | gttctcagtNNNttcagtgat  |
| NatalEDIII-rev-mut69 | agagttctcNNNgctttcagt  |
| NatalEDIII-rev-mut70 | cttagagttNNNagtgctttc  |
| NatalEDIII-rev-mut71 | catcttagaNNNctcagtgct  |
| NatalEDIII-rev-mut72 | catcatcttNNNgttctcagt  |
| NatalEDIII-rev-mut73 | cagcatcatNNNagagttctc  |
| NatalEDIII-rev-mut74 | ttccagcatNNNcttagagtt  |
| NatalEDIII-rev-mut75 | aagttccagNNNcatcttaga  |
| NatalEDIII-rev-mut76 | atcaagttcNNNcatcatctt  |
| NatalEDIII-rev-mut77 | tggatcaagNNNcagcatcat  |
| NatalEDIII-rev-mut78 | tggatcaagNNNtccagcat   |
| NatalEDIII-rev-mut79 | aatgggtggNNNaagttccag  |
| NatalEDIII-rev-mut80 | cccaaatggNNNatcaagttc  |
| NatalEDIII-rev-mut81 | gtccccaaaNNNtggatcaag  |

|                       |                        |
|-----------------------|------------------------|
| NatalEDIII-rev-mut82  | agagtccccNNNtgggtggatc |
| NatalEDIII-rev-mut83  | gtaagagtcNNNaaatgggtgg |
| NatalEDIII-rev-mut84  | aatgtaagaNNNcccaaatgg  |
| NatalEDIII-rev-mut85  | gacaatgtaNNNgtcccaaaa  |
| NatalEDIII-rev-mut86  | tatgacaatNNNagagtcccc  |
| NatalEDIII-rev-mut87  | tcctatgacNNNgtagagtc   |
| NatalEDIII-rev-mut88  | gactcctatNNNaatgtaaga  |
| NatalEDIII-rev-mut89  | cccgactccNNNgacaatgta  |
| NatalEDIII-rev-mut90  | ctccccgacNNNtatgacaat  |
| NatalEDIII-rev-mut91  | cttctccccNNNtcctatgac  |
| NatalEDIII-rev-mut92  | cttcttctcNNNgactcctat  |
| NatalEDIII-rev-mut93  | gatcttcttNNNcccgactcc  |
| NatalEDIII-rev-mut94  | ggtgatcttNNNctccccgac  |
| NatalEDIII-rev-mut95  | gtgggtgatNNNcttctcccc  |
| NatalEDIII-rev-mut96  | gtgggtgggtNNNcttcttctc |
| NatalEDIII-rev-mut97  | ccagtgggtgNNNgatcttctt |
| NatalEDIII-rev-mut98  | gtgccagtgNNNggtgatctt  |
| NatalEDIII-rev-mut99  | cctgtgccaNNNgtgggtgat  |
| NatalEDIII-rev-mut100 | actcctgtgNNNgtgggtgggt |
| NatalEDIII-rev-mut101 | gccactcctNNNccagtgggtg |
| NatalEDIII-rev-mut102 | gctgccactNNNgtgccagtg  |
| NatalEDIII-rev-mut103 | ggtgctgccNNNcctgtgcc   |
| NatalEDIII-rev-mut104 | aatggtgctNNNactcctgtg  |
| NatalEDIII-rev-mut105 | tccaatggtNNNgccactcct  |
| NatalEDIII-rev-mut106 | ttttccaatNNNgctgccact  |
| NatalEDIII-rev-mut107 | tgcttttccNNNgggtgctgcc |
| NatalEDIII-rev-mut108 | aatgctttNNNaatggtgct   |
| NatalEDIII-rev-mut109 | ttcaaatgcNNNtccaatggt  |
| NatalEDIII-rev-mut110 | ggcttcaaaNNNttttccaat  |
| NatalEDIII-rev-mut111 | agtggcttcNNNtgcttttcc  |
| NatalEDIII-rev-mut112 | cacagtggcNNNaaatgcttt  |
| NatalEDIII-rev-mut113 | tctcacagtNNNttcaaatgc  |
| NatalEDIII-rev-mut114 | acctctcacNNNggcttcaaa  |
| NatalEDIII-rev-mut115 | ggcacctctNNNagtggcttc  |
| NatalEDIII-rev-mut116 | cttggcaccNNNcacagtggc  |
| NatalEDIII-rev-mut117 | tctcttggcNNNtctcacagt  |
| NatalEDIII-rev-mut118 | cattctcttNNNacctctcac  |
| NatalEDIII-rev-mut119 | tgccattctNNNggcacctct  |
| NatalEDIII-rev-mut120 | gactgccatNNNcttggcacc  |
| NatalEDIII-rev-mut121 | caagactgcNNNtctcttggc  |
| NatalEDIII-rev-mut122 | tccaagacNNNcattctctt   |
| NatalEDIII-rev-mut123 | gtctcccaaNNNtgccattct  |
| NatalEDIII-rev-mut124 | tgtgtctccNNNgactgccat  |
| NatalEDIII-rev-mut125 | ggctgtgtcNNNcaagactgc  |
| NatalEDIII-rev-mut126 | ccaggctgtNNNtccaagac   |
| NatalEDIII-rev-mut127 | gtcccaggcNNNgtctcccaa  |
| NatalEDIII-rev-mut128 | aaagtcccaNNNtgtgtctcc  |
| NatalEDIII-rev-mut129 | tccaaagtcNNNggctgtgtc  |

|                       |                       |
|-----------------------|-----------------------|
| NatalEDIII-rev-mut130 | tgatccaaaNNNccaggctgt |
| NatalEDIII-rev-mut131 | aactgatccNNNgtcccaggc |
| NatalEDIII-rev-mut132 | tccaactgaNNNaaagtcca  |
| NatalEDIII-rev-mut133 | gcctccaacNNNtccaaagtc |
| NatalEDIII-rev-mut134 | agcgcctccNNNtgatccaaa |
| NatalEDIII-rev-mut135 | gagagcgccNNNaactgatcc |
| NatalEDIII-rev-mut136 | gttgagagcNNNtccaactga |
| NatalEDIII-rev-mut137 | tgagttgagNNNgcctccaac |
| NatalEDIII-rev-mut138 | caatgagttNNNagcgcctcc |
| NatalEDIII-rev-mut139 | gccaatgaNNNgagagcgcc  |
| NatalEDIII-rev-mut140 | cttgcccaaNNNgttgagagc |
| NatalEDIII-rev-mut141 | gcccttgccNNNtgagttgag |
| NatalEDIII-rev-mut142 | gatgcccttNNNcaatgagtt |
| NatalEDIII-rev-mut143 | atggatgccNNNgcccaatga |
| NatalEDIII-rev-mut144 | ttgatggatNNNcttgcccaa |
| NatalEDIII-rev-mut145 | aatttgatgNNNgccttgcc  |
| NatalEDIII-rev-mut146 | aaaaatttgNNNgatgccctt |
| NatalEDIII-rev-mut147 | tccaaaaatNNNatggatgcc |
| NatalEDIII-rev-mut148 | tgctccaaaNNNttgatggat |
| NatalEDIII-rev-mut149 | agctgctccNNNaatttgatg |
| NatalEDIII-rev-mut150 | gaaagctgcNNNaaaaatttg |
| NatalEDIII-rev-mut151 | ttgaaagcNNNtccaaaaat  |
| NatalEDIII-rev-mut152 | tgatttgaaNNNtgctccaaa |
| NatalEDIII-rev-mut153 | caatgatttNNNagctgctcc |
| NatalEDIII-rev-mut154 | aaacaatgaNNNgaaagctgc |
| NatalEDIII-rev-mut155 | tccaaacaaNNNtttgaaagc |
| NatalEDIII-rev-mut156 | tcctccaaaNNNtgatttgaa |
| NatalEDIII-rev-mut157 | cattcctccNNNcaatgattt |
| NatalEDIII-rev-mut158 | ggacattccNNNaacaatga  |
| NatalEDIII-rev-mut159 | ccaggacatNNNtccaaacaa |
| NatalEDIII-rev-mut160 | gaaccaggaNNNtcctccaaa |
| NatalEDIII-rev-mut161 | tgagaaccaNNNcattcctcc |
| NatalEDIII-rev-mut162 | ttgtgagaaNNNggacattcc |
| NatalEDIII-rev-mut163 | gatttgtgaNNNccaggacat |
| NatalEDIII-rev-mut164 | gaggatttgNNNgaaccagga |
| NatalEDIII-rev-mut165 | aatgaggatNNNtgagaacca |
| NatalEDIII-rev-mut166 | tccaatgagNNNttgtgagaa |
| NatalEDIII-rev-mut167 | cgttccaatNNNgatttgtga |
| NatalEDIII-rev-mut168 | caacgttccNNNgaggatttg |
| NatalEDIII-rev-mut169 | cagcaacgtNNNaatgaggat |
| NatalEDIII-rev-mut170 | catcagcaaNNNtccaatgag |
| NatalEDIII-rev-mut171 | ccacatcagNNNcgttccaat |
| NatalEDIII-rev-mut172 | caaccacatNNNcaacgttcc |
| NatalEDIII-rev-mut173 | acccaaccaNNNcagcaacgt |
| NatalEDIII-rev-mut174 | cagacccaaNNNcatcagcaa |
| NatalEDIII-rev-mut175 | gttcagaccNNNccacatcag |
| NatalEDIII-rev-mut176 | tgtgttcagNNNcaaccacat |
| NatalEDIII-rev-mut177 | ctttgtgttNNNacccaacca |



|                       |                       |
|-----------------------|-----------------------|
| NatalEDIII-rev-mut178 | attccttgtNNNcagacccaa |
| NatalEDIII-rev-mut179 | tccattcttNNNgttcagacc |
| NatalEDIII-rev-mut180 | agatccattNNNtgtgttcag |
| NatalEDIII-rev-mut181 | aatagatccNNNctttgtgtt |
| NatalEDIII-rev-mut182 | ggaaatagaNNNattccttgt |
| NatalEDIII-rev-mut183 | aagggaaatNNNtccattctt |
| NatalEDIII-rev-mut184 | cataagggaNNNagatccatt |
| NatalEDIII-rev-mut185 | gcacataagNNNaatagatcc |
| NatalEDIII-rev-mut186 | caagcacatNNNggaaataga |
| NatalEDIII-rev-mut187 | ggccaagcaNNNaagggaaat |
| NatalEDIII-rev-mut188 | taaggccaaNNNcataaggga |
| NatalEDIII-rev-mut189 | ccctaaggcNNNgcacataag |
| NatalEDIII-rev-mut190 | tccccctaaNNNcaagcacat |
| NatalEDIII-rev-mut191 | cactccccNNNggccaagca  |
| NatalEDIII-rev-mut192 | caacactccNNNtaaggccaa |
| NatalEDIII-rev-mut193 | gatcaacacNNNccctaaggc |
| NatalEDIII-rev-mut194 | gaagatcaaNNNtccccctaa |
| NatalEDIII-rev-mut195 | taagaagatNNNcactcccc  |
| NatalEDIII-rev-mut196 | ggataagaaNNNcaacactcc |
| NatalEDIII-rev-mut197 | tgtggataaNNNgatcaacac |
| NatalEDIII-rev-mut198 | ggctgtggaNNNgaagatcaa |
| NatalEDIII-rev-mut199 | gacggctgtNNNtaagaagat |
| NatalEDIII-rev-mut200 | agagacggcNNNggataagaa |
| NatalEDIII-rev-mut201 | agcagagacNNNtgtggataa |
| NatalEDIII-rev-mut202 | atcagcagaNNNggctgtgga |
| NatalEDIII-rev-mut203 | cacatcagcNNNgacggctgt |
| NatalEDIII-rev-mut204 | ccccacatcNNNagagacggc |
